# Supplementary figures and images for: Extreme ultraviolet lithography reaches 5 nm resolution
Source: Royal Society of Chemistry journal article supplement (doi:10.1039/d4nr01332h), 2024-01-01

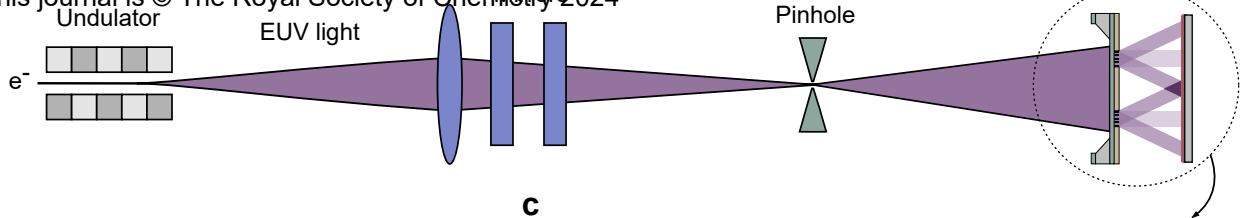

**b**

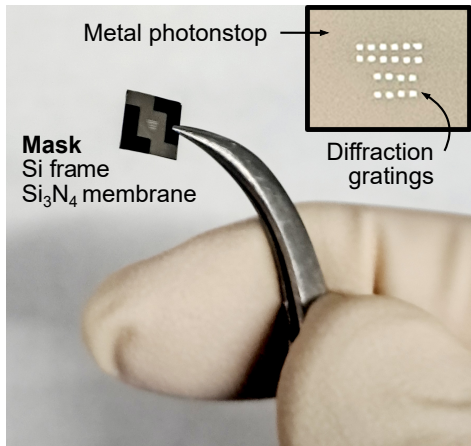

**c**

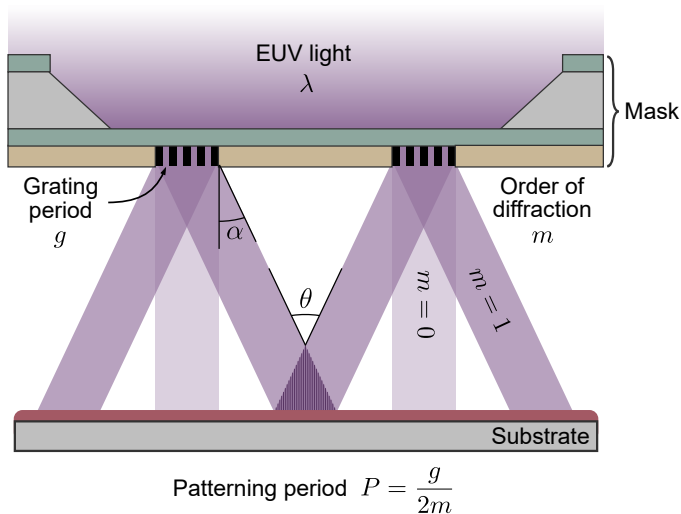

Supplement: d4nr01332h2.pdf [file d4nr01332h2.pdf]

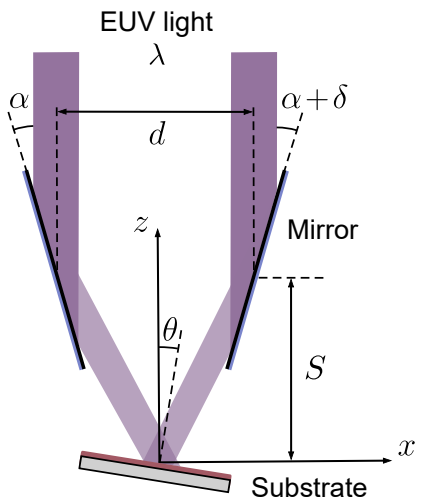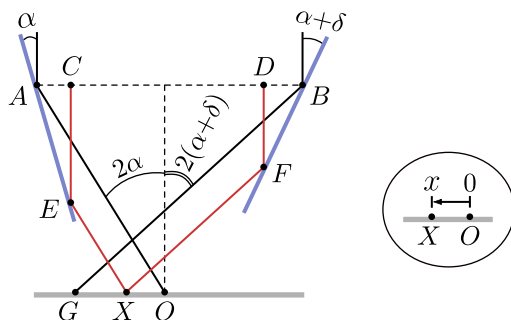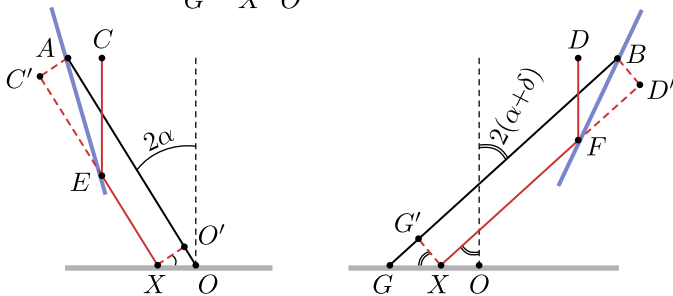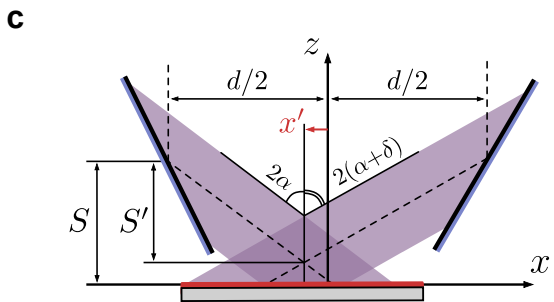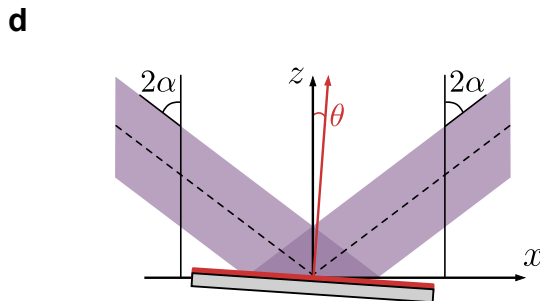

Supplement: d4nr01332h3.pdf [file d4nr01332h3.pdf]

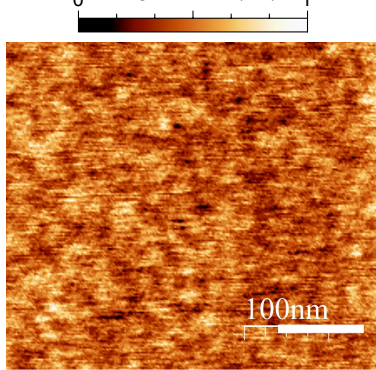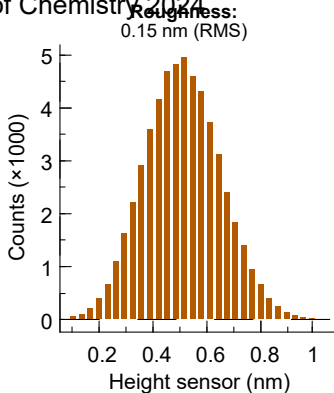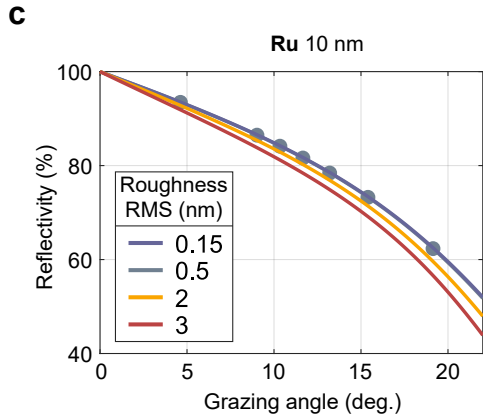

Supplement: d4nr01332h4.pdf [file d4nr01332h4.pdf]
